# Supplementary material
Source: PubMed Central journal article supplement (PMC6186433)

## Supplemental Data

### Supplemental Figure Legends

**Figure S1. Expression of *GIT1* in human brain and *GIT1* in mouse brain (related to Figure 1).** (A) mRNA expression pattern of *GIT1* in human brain regions relative to a selection of non-neuronal tissue from the Genotype-Tissue Expression (GTEx) Project (<http://www.gtexportal.org/home/>). (B) mRNA expression pattern of *GIT1* in C57BL/6J mouse brain from Allen Brain Atlas. Note high expression of *GIT1* in hippocampus and throughout the cortex, which is similar to previous observations using a gene trap  $\beta$ -galactosidase reporter mouse (13).

**Figure S2. Specific coupling of *GIT1* to *PAK3* over *PAK1* (related to Figure 2).** (A) *GIT1* alone cannot activate MAPK kinases or AKT in HEK293 cells with normal culture conditions or with serum starvation as judged by phospho-specific antibodies. HEK293 cells were transfected with the indicated control or *GIT1* expression vectors. One day after transfection, cells were harvested in 2X SDS sample buffer, and analyzed with immunoblot analysis using the indicated antibodies. For the serum starvation, 4hrs post transfection, culture media was replaced with serum free media. For quantification, band intensities were normalized to GAPDH intensities, and then to empty vector controls, in order to obtain fold changes in the presence (B) or absence (C) of serum. (D-F) Lack of effect of wild-type *GIT1* and *GIT1*-R283W on *PAK1* and MAPK activation in HEK293 cells. Cells were co-transfected with the indicated expression vectors and 24hrs later cells were harvested in 2X SDS sample buffer. (D) Protein samples were subjected to immunoblot analysis using the indicated antibodies. (E) For immunoblots other than those for the phospho-PAKs, band intensities were normalized to GAPDH band intensities, and then to values observed in wild-type *GIT1*-transfected cells in order to obtain

fold changes (data represent mean  $\pm$  SEM; N = 3; ns = not significant; two-way ANOVA). For phospho-PAK immunoblots (F), band intensities were normalized to total Myc-PAK1 signals, and then to values for wild-type GIT1-transfected cells, in order to obtain fold changes (data represent mean  $\pm$  SEM; N = 3; ns = not significant; two-way ANOVA).

**Figure S3. Effects of lentivirus-mediated overexpression of GIT1 and GIT1-R283W on synaptic protein expression in primary hippocampal cultures (related to Figures 3 and 4).**

Primary cultured hippocampal neurons at DIV 14-16 were infected with lentiviruses expressing the indicated wild-type GIT1, GIT1-R283W, or empty vector control constructs. One week after infection, hippocampal neurons were harvested in 2X SDS sample buffer and analyzed by immunoblot using the indicated antibodies (GAPDH and GIT1-FLAG blots shown here are the same blots as shown in Figure 3) (A). (B) Synaptic protein immunoblot band intensities were normalized to GAPDH levels, and then to empty vector control lentivirus to obtain fold changes. Data represent mean  $\pm$  SEM; N = 8; \* =  $p < 0.05$ ; ns = not significant; two-way ANOVA with *post hoc* across row comparisons using a Tukey correction.

**Figure S4. Homology model of GIT1 ArfGAP variants.** (A) Location of three SNVs within the ArfGAP domain of GIT1. (B) Structure-guided sequence alignment of GIT1 and related GAPs for which X-ray structures are known and in the Protein Data Bank (<http://www.rcsb.org/pdb>). Residues E33 (pink highlight and arrow) and V37 (pink highlight and arrow) map to a well-conserved  $\alpha$ -helix and are flanked by regions of high sequence similarity. R39 is the conserved arginine finger catalytic residue (turquoise highlight and arrow). All proteins in alignment are human except PFL2140c (*Plasmodium falciparum*), cgd5\_1040 (*Cryptosporium parvum*) and ASAP2 (*Mus musculus*). Consensus secondary structure prediction symbols: alpha-helix: h; beta-strand: e. (C-E) Homology model of the ArfGAP domain of human GIT1 based on the atomic coordinates of the ArfGAP domain from human ACAP1 (pdbid: 3JUE). Color-coding for

(D) and (E): carbons in GIT1 side chains are green for wild-type residues and pink for mutant residues; carbons in SMAP1 (pdbid: 2IQJ) side chains are grey; oxygen, red; nitrogen, blue; and sulfur, yellow. The  $Zn^{2+}$ -ion is shown as a blue-grey sphere. (C) Ribbon diagram showing the location of residues E33, V37, and A55 and the  $Zn^{2+}$  ion. C- and N-termini are indicated. Residues E33 and V37 are located on a helix that is central to the ArfGAP fold near the  $Zn^{2+}$ -finger. The GIT1-A55T variant replaces a small residue located in a poorly conserved loop at the protein surface and is not expected to disrupt the GIT1 structure. (D) The GIT1-E33K variant replaces a negatively charged residue with a positive charged residue at the surface of the protein near the  $Zn^{2+}$ -binding site. However, the ArfGAP fold can tolerate a variety of residues at this position, as shown in the sequence alignment in (B), including arginine (R50) in SMAP1 that is accommodated by a compensatory small residue V110 (K103 in GIT1). This suggests that GIT1-E33K may have complex effects on protein folding, stability, degradation and/or interactions with its partners. (E) The GIT1-V37M variant replaces a small hydrophobic residue with a large one and is expected to lead to steric clashes with I107 near the  $Zn^{2+}$ -binding site and destabilization of the protein leading to lower protein levels.

## Supplemental Table Legends

**Table S1, related to Figure 1.** Summary of coding variants found in SCZ patients and controls by exome sequencing in the Swedish schizophrenia case-control study (10). Coordinates of each variant are given for genome build GRCh37/hg19.

**Table S2, related to Figure 1.** Summary of unique coding variants in GIT1, allele frequencies in the ExAC exome database (<http://exac.broadinstitute.org/gene/ENSG00000108262>), and predicted impact on function by PolyPhen. At the time of analysis, the ExAC database contained exome sequencing data from 60,706 unrelated individuals, including the Swedish SCZ cases and controls, as well as the parents but not probands from the Bulgarian trio studies.

## Supplemental Tables

Table S1.

| #  | Chr   | Pos      | ID                 | Ref/Alt | Schizophrenia (A) :<br>Control (U) |
|----|-------|----------|--------------------|---------|------------------------------------|
| 1  | chr17 | 27901774 | .                  | G/A     | A=5;U=1                            |
| 2  | chr17 | 27901903 | rs11548560         | T/C     | A=42;U=50                          |
| 3  | chr17 | 27902156 | rs145991218        | C/T     | A=0;U=1                            |
| 4  | chr17 | 27902326 | .                  | G/T     | A=3;U=0                            |
| 5  | chr17 | 27902672 | .                  | G/A     | A=1;U=1                            |
| 6  | chr17 | 27902708 | .                  | C/CG    | A=0;U=1                            |
| 7  | chr17 | 27902709 | .                  | G/A     | A=0;U=1                            |
| 8  | chr17 | 27902831 | .                  | G/A     | A=2;U=1                            |
| 9  | chr17 | 27902849 | .                  | T/A     | A=1;U=0                            |
| 10 | chr17 | 27902866 | .                  | C/T     | A=1;U=2                            |
| 11 | chr17 | 27903117 | .                  | G/A     | A=1;U=0                            |
| 12 | chr17 | 27903301 | rs144464404        | C/G     | A=2;U=2                            |
| 13 | chr17 | 27903304 | rs148402352        | G/A     | A=0;U=2                            |
| 14 | chr17 | 27903359 | rs147741808        | C/G     | A=1;U=0                            |
| 15 | chr17 | 27903418 | .                  | C/T     | A=1;U=0                            |
| 16 | chr17 | 27903544 | .                  | C/T     | A=2;U=1                            |
| 17 | chr17 | 27903555 | rs145208703        | C/G     | A=2;U=2                            |
| 18 | chr17 | 27903666 | .                  | G/A     | A=1;U=0                            |
| 19 | chr17 | 27903908 | rs141462052        | G/A     | A=1;U=0                            |
| 20 | chr17 | 27903993 | .                  | C/T     | A=0;U=1                            |
| 21 | chr17 | 27903998 | rs144787773        | A/C     | A=2;U=1                            |
| 22 | chr17 | 27904711 | rs11080105         | G/A     | A=1731;U=1706                      |
| 23 | chr17 | 27904723 | .                  | T/A     | A=1;U=2                            |
| 24 | chr17 | 27905359 | .                  | T/C     | A=0;U=1                            |
| 25 | chr17 | 27905380 | .                  | G/A     | A=4;U=0                            |
| 26 | chr17 | 27905809 | .                  | G/A     | A=1;U=0                            |
| 27 | chr17 | 27906001 | .                  | C/G     | A=1;U=0                            |
| 28 | chr17 | 27908989 | .                  | A/T     | A=1;U=0                            |
| 29 | chr17 | 27909004 | .                  | C/T     | A=0;U=1                            |
| 30 | chr17 | 27909707 | <u>rs182492370</u> | C/T     | A=19;U=19                          |
| 31 | chr17 | 27909978 | .                  | G/A     | A=0;U=1                            |
| 32 | chr17 | 27910032 | .                  | G/A     | A=0;U=1                            |
| 33 | chr17 | 27910510 | <u>rs141157150</u> | C/T     | A=0;U=1                            |
| 34 | chr17 | 27910524 | <u>rs187487955</u> | C/T     | A=0;U=1                            |
| 35 | chr17 | 27910537 | <u>rs147244911</u> | G/A     | A=3;U=3                            |
| 36 | chr17 | 27910578 | .                  | C/T     | A=1;U=0                            |
| 37 | chr17 | 27910590 | .                  | C/T     | A=1;U=0                            |

**Table S2. Summary of GIT1 variant allele frequency data and PolyPhen2 predictions scores.**

| Swed./Bulg. Studies* SNV | Hg19 Genomic Position (Chr17) | Amino Acid Variant | dbSNP Variant | ExAC Allele Count*               | PolyPhen2 Prediction |
|--------------------------|-------------------------------|--------------------|---------------|----------------------------------|----------------------|
| <b>Case Unique</b>       | 27910590                      | E33K               | no            | 1                                | 0.997                |
| <b>Case Unique</b>       | 27910578                      | V37M               | no            | 10                               | 0.997                |
| <b>Case Unique</b>       | 27906001                      | R256P              | no            | 1                                | 0.158                |
| <b>Case Unique</b>       | 27905380                      | R283W [4:0]        | no            | 6 [5 known to be from SCZ cases] | 0.999                |
| <b>Case Unique</b>       | 27903359                      | G506A              | rs147741808   | 9                                | 0                    |
| <b>Case Unique</b>       | 27902849                      | Q587L              | no            | 1                                | 0.005                |
| <b>De Novo</b>           | 27902699                      | S601N              | no            | N/A                              | 0.935                |
|                          |                               |                    |               |                                  |                      |
| <b>Control Unique</b>    | 27910524                      | A55T               | rs187487955   | 27                               | 0.051                |
| <b>Control Unique</b>    | 27905359                      | M290V              | no            | 2                                | 0.763                |
| <b>Control Unique</b>    | 27903993                      | R381Q              | no            | 1                                | 0.075                |
| <b>Control Unique</b>    | 27902709                      | R598C              | no            | 1                                | 0.994                |
| <b>Control Unique</b>    | 27902156                      | V681M              | rs145991218   | 3                                | 0.517                |

\*(8, 10)

\*case/control status of new allele counts not identified

A

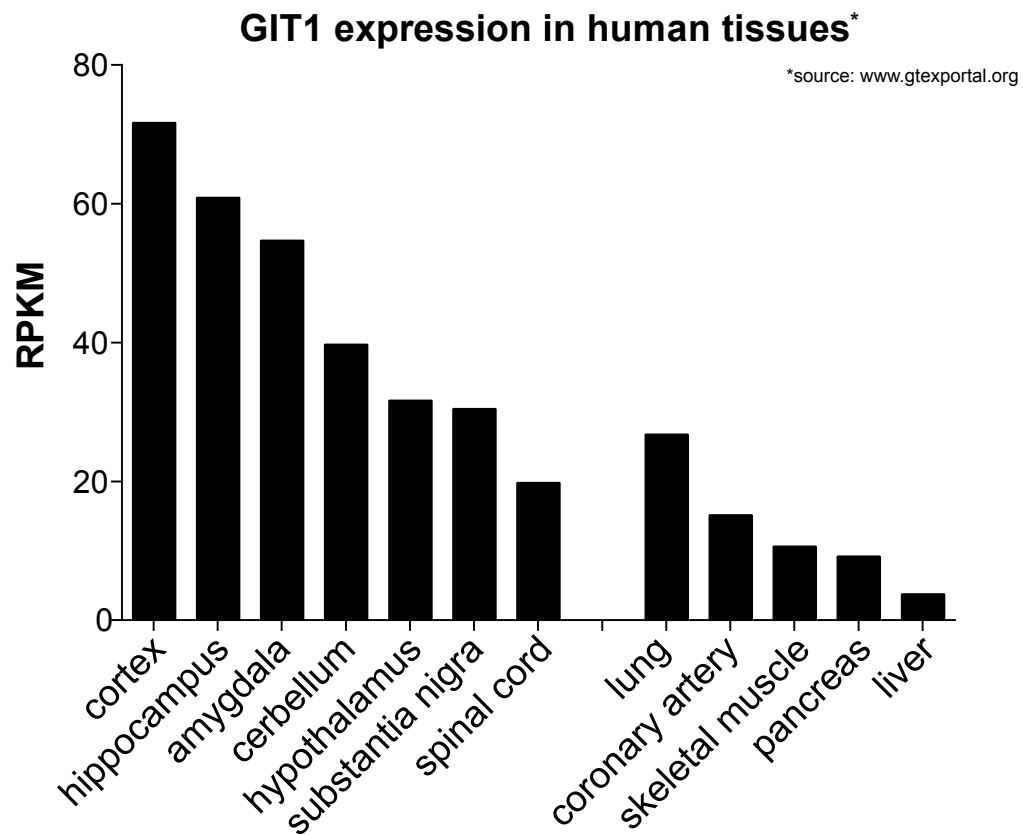

B

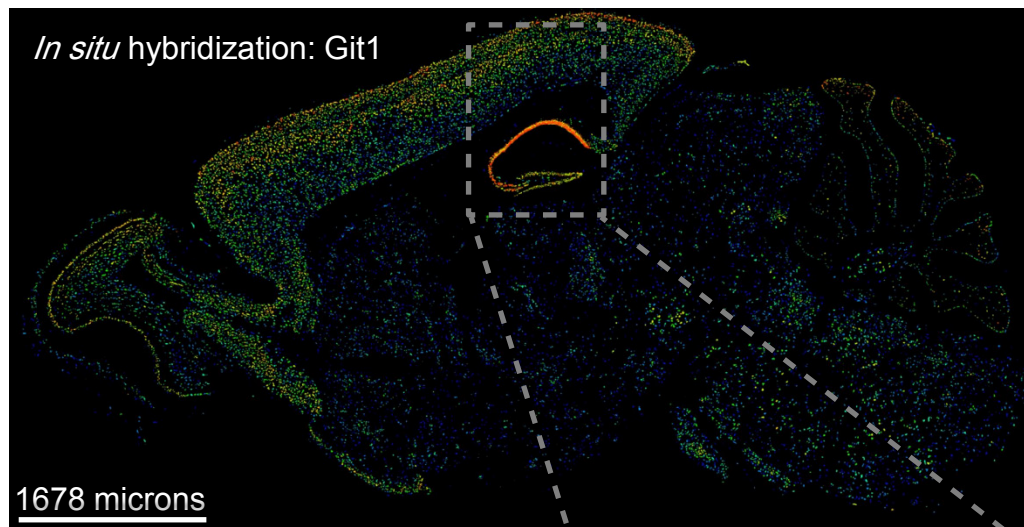

C57BL/6J  
male  
post-natal day 56  
Git1-RP\_050428\_04\_F12  
sagittal

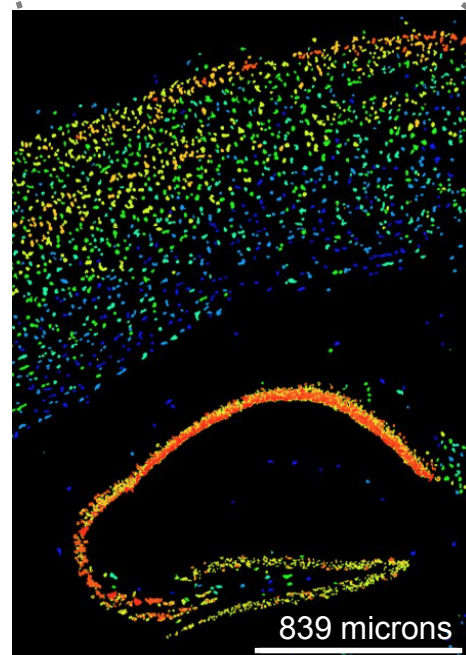

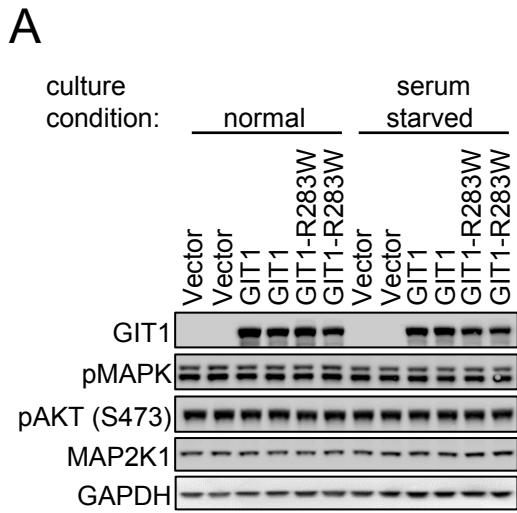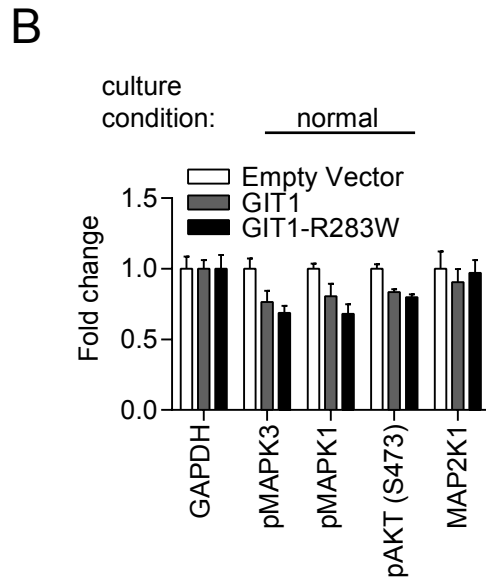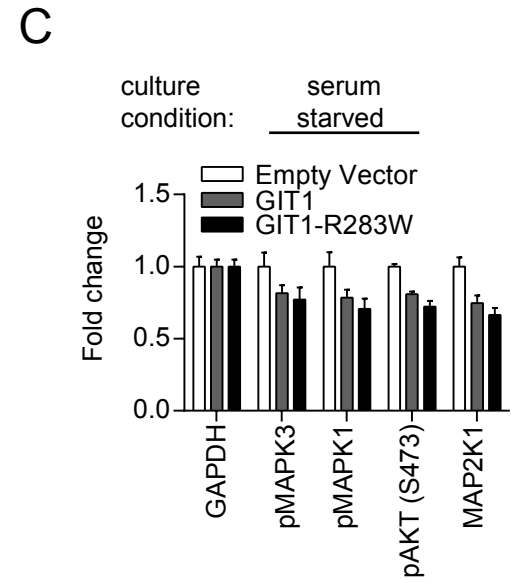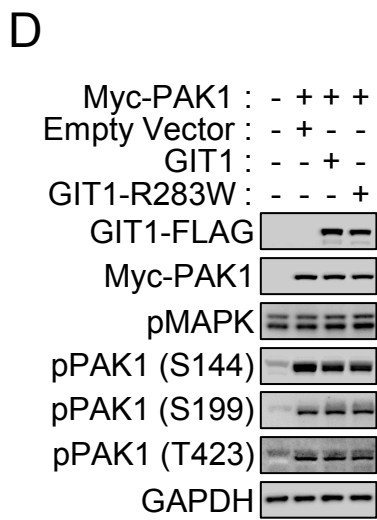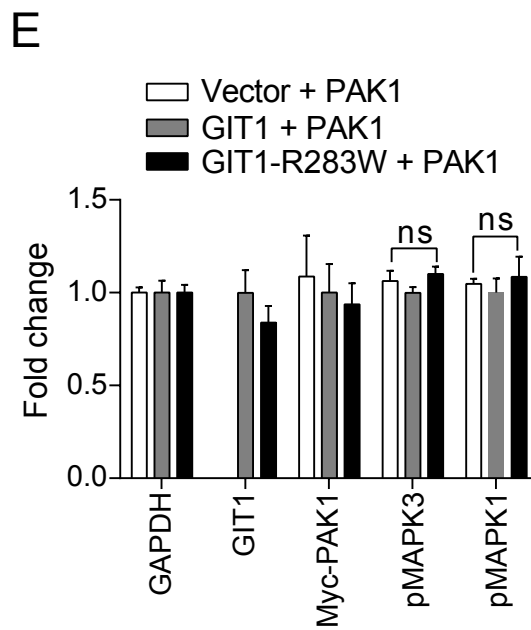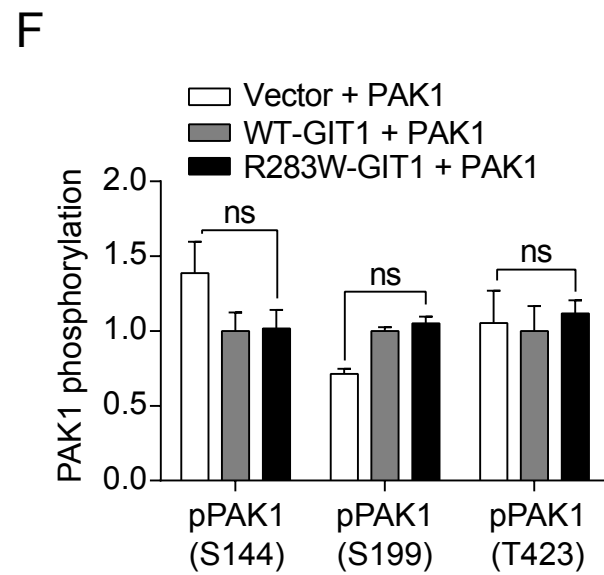



A

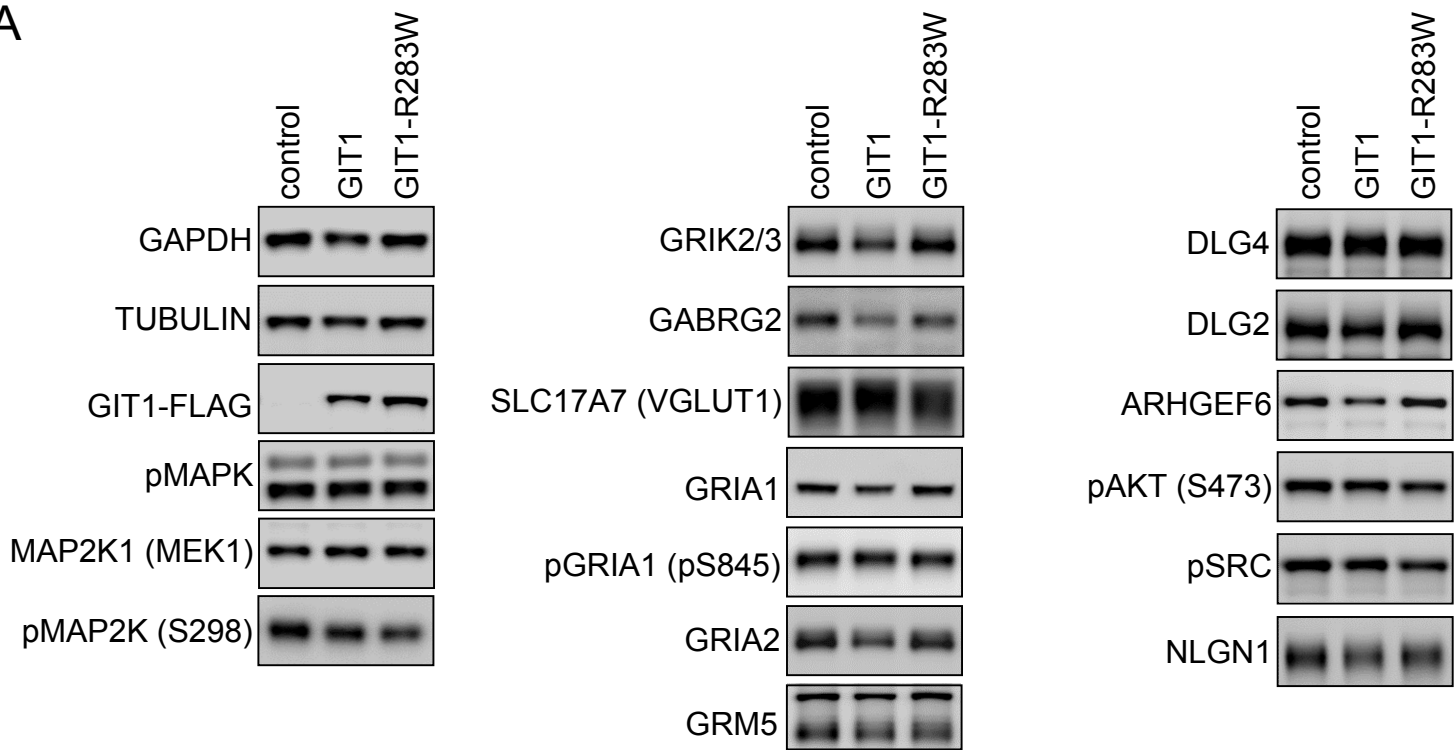

B

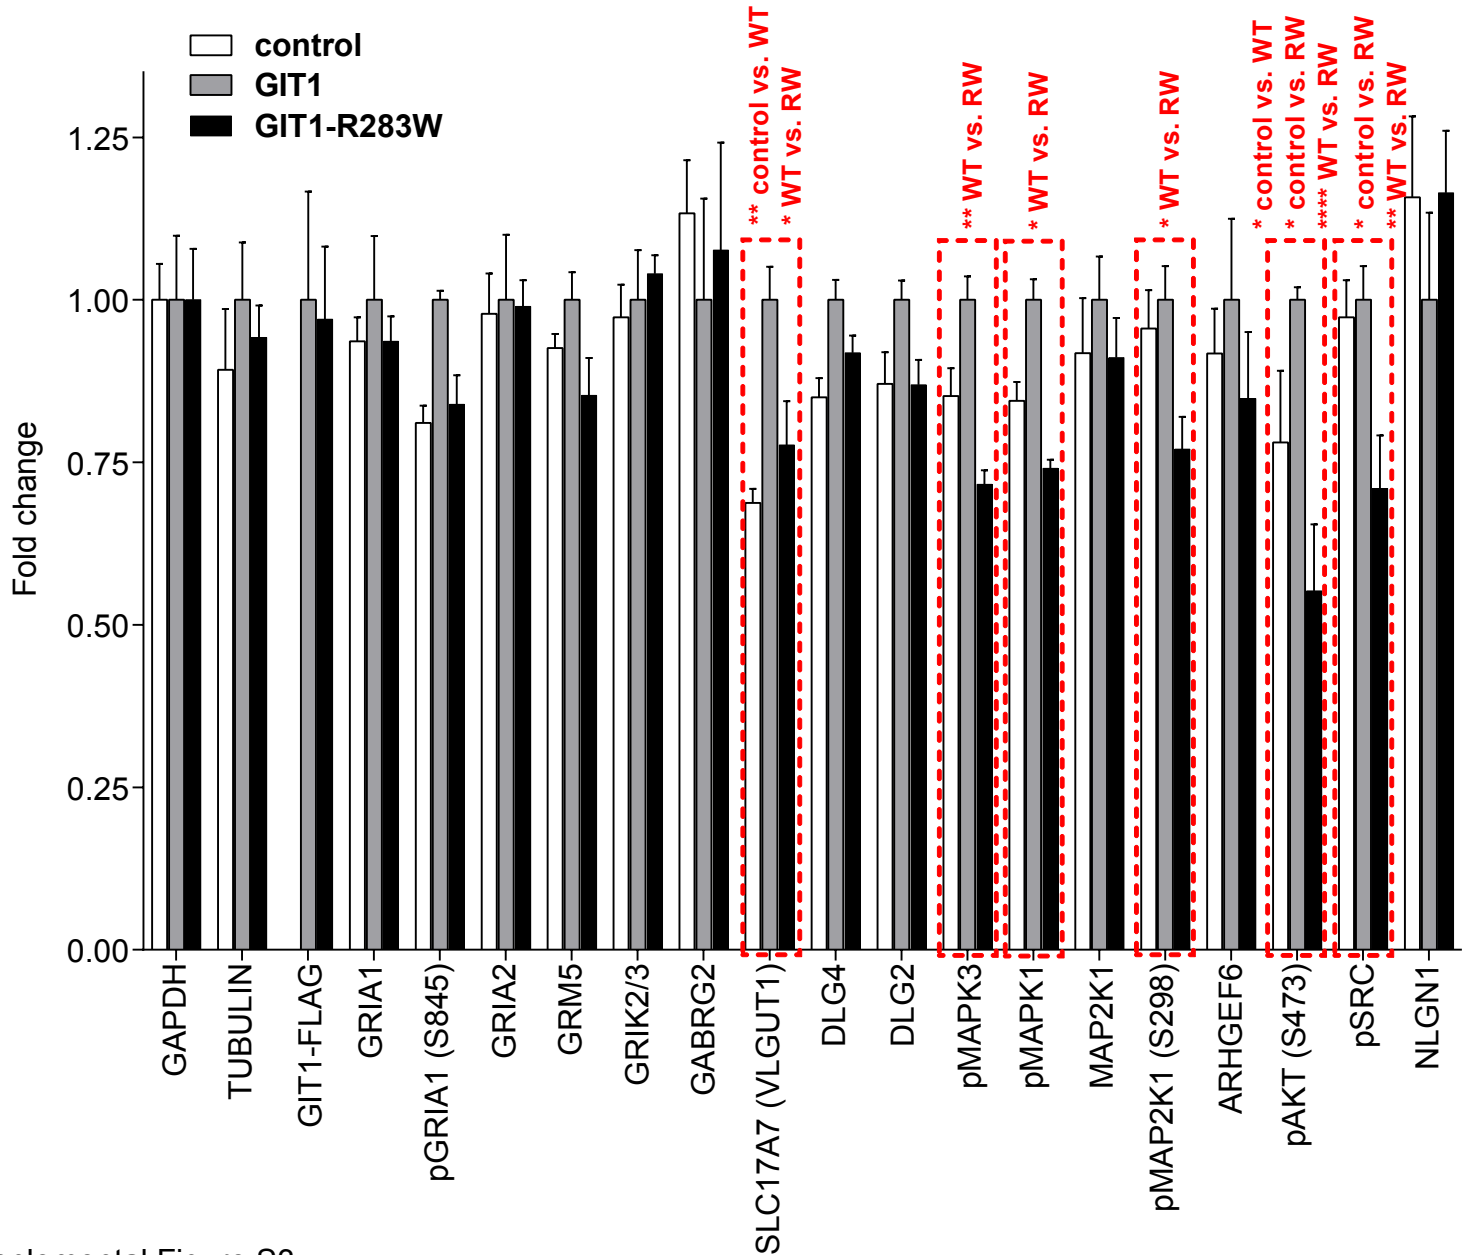

A

## GIT1 ArfGAP Coding Variants

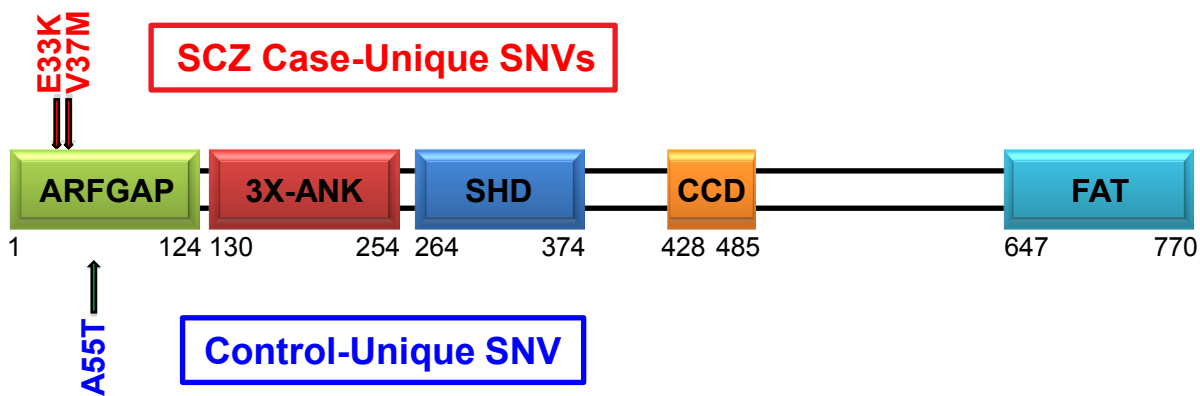

B

## GIT1 Family ArfGAP Sequence Alignment

|                  |                                                                                                                                                                                                                   | E33 | V37 | R39 | A55 |
|------------------|-------------------------------------------------------------------------------------------------------------------------------------------------------------------------------------------------------------------|-----|-----|-----|-----|
| <b>GIT1</b>      | SRKGPRAEV <b>C</b> AD <b>C</b> SAPDPGWASISRGLV <b>V</b> <b>C</b> D <b>F</b> C <b>S</b> V <b>H</b> R <b>S</b> LGHRHISIVKHLRHS- <b>A</b> WPPTLLQMVHTLASNGANSIWEHSL-                                                 | ↓   | ↓   | ↓   | ↓   |
| 3JUE (ACAP1)     | VQSVDGNAQ <b>C</b> D <b>C</b> REPAPWASINLGVTL <b>C</b> I <b>Q</b> CSGIHRSLGVHFSKVRSLTLD-SWEPVLVKLMCELGNVINQIYEA-RVE                                                                                               |     |     |     |     |
| 3SUB (PFL2140c)  | KKEDSN <b>N</b> K <b>C</b> F <b>D</b> C <b>G</b> ISNPDWVSVNHGIFL <b>C</b> I <b>N</b> CSGVHRSLGVHISIVRSIKMD-IFTDEQLKYIDKGGNKKCQTYLENYGI-                                                                           |     |     |     |     |
| 3DWD (ARFGAP1)   | VRVQDEN <b>N</b> V <b>C</b> F <b>E</b> C <b>G</b> AFNPQWVSVTYGIW <b>I</b> C <b>L</b> E <b>C</b> SGRHRGLGVHLSFVRSVT---MWKDIELEKMKAGNAKFREFLESQEDY                                                                  |     |     |     |     |
| 2P57 (ARFGAP2)   | LRAVPT <b>N</b> K <b>A</b> C <b>F</b> D <b>C</b> GAKNPWASITYGVFL <b>C</b> I <b>D</b> CSGVHRSLGVHLSFIRSTELDSNWNWFQLRCMQVGGNANATAFFRQHGC-                                                                           |     |     |     |     |
| 2CRW (ARFGAP3)   | LRVPT <b>N</b> K <b>V</b> C <b>F</b> D <b>C</b> GAKNPWASITYGVFL <b>C</b> I <b>D</b> CSGSHRSLGVHLSFIRSTELDSNWSWFQLRCMQVGGNASASSFFHQHGC-                                                                            |     |     |     |     |
| 2OWA (cgd5_1040) | VRNR <b>P</b> EN <b>R</b> T <b>C</b> F <b>D</b> C <b>E</b> SRNPTWLSLSFAVF <b>I</b> C <b>L</b> N <b>C</b> SSDHRKMGVHISFVRSDDL-KFTPIQLVRMDIGGNGRARNYFKQVLG-                                                         |     |     |     |     |
| 3FEH (CENTA1)    | LLQ <b>R</b> PG <b>N</b> AR <b>C</b> AD <b>C</b> GAPDPDWAS <b>Y</b> TLGV <b>F</b> I <b>C</b> LS <b>C</b> SGIHRNIP-QVSKVKS <b>V</b> RLD-AWEEAQVEFMASHGNDAAARARFES-KVP                                              |     |     |     |     |
| 2IQJ (SMAP1L)    | LLLEED <b>N</b> K <b>F</b> AD <b>C</b> D <b>C</b> QSKGPRWASWNIGV <b>F</b> I <b>C</b> IR <b>C</b> AGIHRNLGVHISRVKSVNLD-QWTQE <b>Q</b> I <b>Q</b> CMQEMGN <b>G</b> KANRLYEA-YLP                                     |     |     |     |     |
| 2CRR (SMAP1)     | LLREED <b>N</b> K <b>Y</b> AD <b>C</b> EAKGPRWASWNIGV <b>F</b> I <b>C</b> IR <b>C</b> AGIHRNLGVHISRVKSVNLD-QWTAE <b>Q</b> I <b>Q</b> CMQDMGN <b>T</b> KARLLYEA-NLP                                                |     |     |     |     |
| 1DCQ (ASAP2)     | VQ <b>R</b> MT <b>G</b> ND <b>V</b> C <b>D</b> C <b>G</b> APDPTW <b>L</b> STNLG <b>I</b> L <b>T</b> C <b>I</b> E <b>C</b> SGIHRELGVHYSRMQSLTLD-VLGTSELLLAKNIGNAGFNEIMEC-CLP                                       |     |     |     |     |
| 2B00 (ASAP3)     | VKS <b>R</b> PG <b>N</b> S <b>Q</b> C <b>D</b> C <b>G</b> AADPTW <b>L</b> STNLG <b>V</b> L <b>T</b> C <b>I</b> Q <b>C</b> SGVHRELGVRF <b>S</b> RMQSLTLD-LLGPSELLLALNMGNTSFNEVMEA-QLP                              |     |     |     |     |
| 2D9L (AGFG1)     | MTGLPH <b>N</b> R <b>K</b> C <b>F</b> D <b>C</b> D <b>Q</b> RGPT <b>V</b> NMTVGS <b>F</b> V <b>C</b> T <b>S</b> CSGSLRGLN-PPHRVKSISMT-TFTQ <b>Q</b> E <b>I</b> EFLQKHGNEVCKQ <b>I</b> WLG-LFD                     |     |     |     |     |
| Consensus aa:    | hp...s.Np.Ch <b>DC</b> ...sPp <b>WhShshG</b> lh <b>l</b> Ch <b>p</b> C <b>tt</b> . <b>HR</b> .Ls <b>V</b> ph <b>S</b> . <b>l</b> + <b>S</b> lphs...@...p <b>l</b> bh... <b>GN</b> ..h <b>pp</b> h <b>h</b> c...h. |     |     |     |     |
| Consensus ss:    | eeee eeee eeeee hhhhhhh eeeee hhhhhhhhh h hhhhhhh h                                                                                                                                                               |     |     |     |     |

C

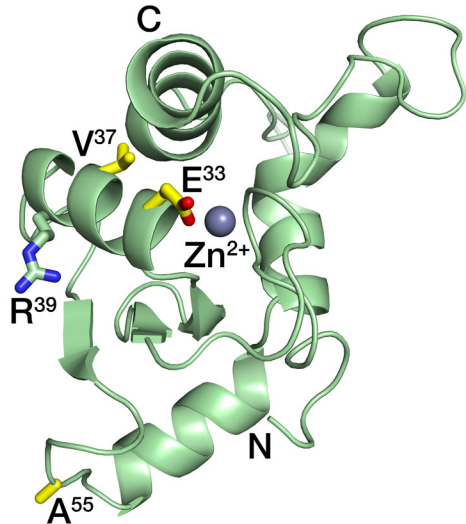

D

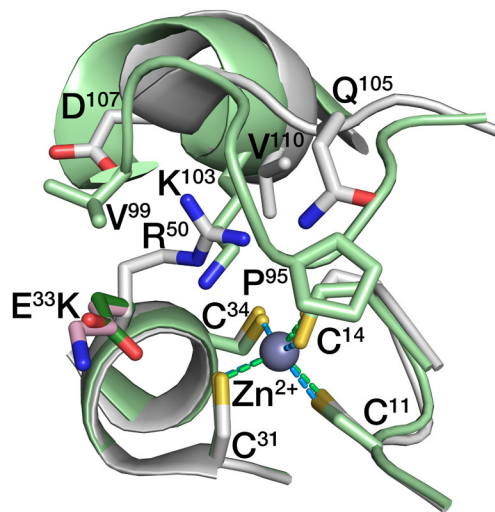

E

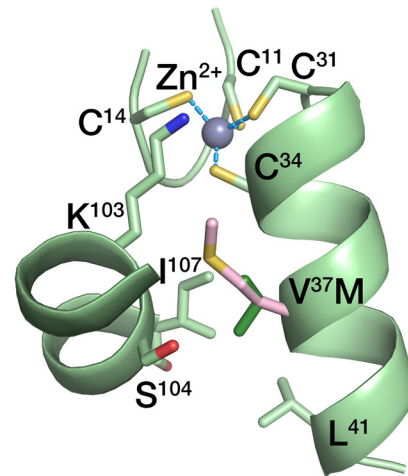

Supplement: NIHMS989728-supplement-1.pdf [file NIHMS989728-supplement-1.pdf]
